# Supplementary material for: Exclusive ion recognition using host–guest sandwich complexes
Source: Royal Society of Chemistry journal article supplement (doi:10.1039/d3cp05070j), 2023-12-26
Supplement: d3cp05070j1.pdf [file d3cp05070j1.pdf]

# Supplementary Information for: Exclusive Ion Recognition Using Host-Guest Sandwich Complexes<sup>†</sup>

Nitesh Kumar<sup>a\*</sup>

<sup>a\*</sup> *Department of Chemistry, Washington State University, Pullman, WA, 99163*

E-mail: nitesh.kumar@wsu.edu

## List of Figures

- 1 Radial distribution ( $g(r)$ ) and coordination number ( $n(r)$ ) between  $\text{Cs}^+$  and  $\text{O}_C$  (oxygen atoms of 18-crown-6) as a function of radial distance for different host force fields. . . . . 4
- 2 Average Coordination number of interacting  $\text{O}_C$  (crown oxygen atoms) around central  $\text{Cs}^+$  ions in systems with crown ether modelled using different force fields. Note that only  $\text{Cs}^+$  atoms that were directly interacting with the host molecules were taken into consideration for these calculations. The standard deviations of the coordination distributions of each host-guest system is shown as error bars. . . . . 5

|   |                                                                                                                                                                                                                                                                                                                                                                                                                                                                                                                                                                                                                                                                                                                                                                                            |    |
|---|--------------------------------------------------------------------------------------------------------------------------------------------------------------------------------------------------------------------------------------------------------------------------------------------------------------------------------------------------------------------------------------------------------------------------------------------------------------------------------------------------------------------------------------------------------------------------------------------------------------------------------------------------------------------------------------------------------------------------------------------------------------------------------------------|----|
| 3 | (A) Coordination number of $O_C$ (podand oxygen atoms) around central $Cs^+$ ions with increase in the podand concentration. (B) An illustration of a sandwich complex formed between podands and $Cs^+$ at $n=260$ . Cesium ions are shown in blue, podand oxygen atoms are shown in red and all other atoms are colored grey. (C) The coordination number of $O_C$ (cryptand oxygen atoms) around central $Cs^+$ ions with an increase in the cryptand concentration. (D) An illustration of a sandwich complex formed by cryptand with $Cs^+$ at $n=260$ . Cesium ions are shown in blue, cryptand oxygen atoms are shown in red and all other atoms are colored grey. The standard deviations of coordination distributions of each host-guest system are shown as error bars. . . . . | 7  |
| 4 | Probability distribution of $O_C$ (crown) around $Cs^+$ in the primary coordination shell at different crown concentrations. . . . .                                                                                                                                                                                                                                                                                                                                                                                                                                                                                                                                                                                                                                                       | 8  |
| 5 | Potential of mean force (PMF) between $Cs^+$ and crown with the $Cs^+$ -crown distance as reaction coordinate from bound to unbound state in aqueous media. (A) PMF for $Cs^+$ binding to form 1:1 host-guest complex. (B) PMF for guest binding to form 2:1 sandwich complex. An illustration of host-guest complexes and the reaction coordinate is provided on the top of the respective PMFs. . . . .                                                                                                                                                                                                                                                                                                                                                                                  | 8  |
| 6 | Combined angular/spatial distributions of $O_{C(i)}-Cs^+-O_{C(i-1)}$ angle and $Cs^+-O_{C(i)}$ distances between $Cs^+$ ions and crown oxygen atoms in systems with (A1.) 40 (A2.) 130 (A3.) 260 podand and (B1.) 40 (B2.) 130 (B3.) 260 cryptand molecules. . . . .                                                                                                                                                                                                                                                                                                                                                                                                                                                                                                                       | 9  |
| 7 | Solvent accessible surface area (SASA) of podand and crown at different host concentrations. . . . .                                                                                                                                                                                                                                                                                                                                                                                                                                                                                                                                                                                                                                                                                       | 9  |
| 8 | Probability distribution of $O_W$ (water oxygen atoms) around $O_C$ (host oxygen atoms) of (A) podand and (B) 18-crown-6 molecules at different concentrations. . . . .                                                                                                                                                                                                                                                                                                                                                                                                                                                                                                                                                                                                                    | 10 |

|    |                                                                                                                                                                                                                                                                                                                                                                                                                                                                                                                                                                                  |    |
|----|----------------------------------------------------------------------------------------------------------------------------------------------------------------------------------------------------------------------------------------------------------------------------------------------------------------------------------------------------------------------------------------------------------------------------------------------------------------------------------------------------------------------------------------------------------------------------------|----|
| 9  | Ensemble average residence times of the H <sub>2</sub> O molecules in primary Cs <sup>+</sup> coordination shells in systems with 18-crown-6. The lifetimes were fitted to the linear regression model to probe the linear dependence of solvation dynamics on system composition. . . . .                                                                                                                                                                                                                                                                                       | 10 |
| 10 | Residence time of O <sub>N</sub> (nitrate oxygen atoms) in the primary coordination of Cs <sup>+</sup> atoms as a function of host concentration. . . . .                                                                                                                                                                                                                                                                                                                                                                                                                        | 11 |
| 11 | Mean square displacements of host molecules at different host concentrations.                                                                                                                                                                                                                                                                                                                                                                                                                                                                                                    | 11 |
| 12 | Potential of mean forces between Cs <sup>+</sup> -N(NO <sub>3</sub> <sup>-</sup> ) and Cs-O(H <sub>2</sub> O) with the radial distance as reaction coordinate. . . . .                                                                                                                                                                                                                                                                                                                                                                                                           | 11 |
| 13 | (A) Radial distribution and coordination number as a function of the radial distance between oxygen atoms within different host-guest systems. (B) Probability of different water (O <sub>w</sub> ) coordination in the systems with different host molecules. A 3.5 Å cutoff is used to obtain the water-water coordination numbers. (C) The sixth order Steinhardt parameter q <sub>6</sub> probability distributions for water ordering in systems with 18-crown-6 as host. Note that O(H <sub>2</sub> O) atoms were considered as the reference for the computation. . . . . | 13 |

# Methodology

Table S 1: The compositions of the systems simulated in this study. Ligand represents the three different types of host molecules namely podand, 18-crown-6, and [2.2.2]-cryptand used in this study. Equilibrated box dimensions are provided for the systems with 18-crown-6.

| H <sub>2</sub> O | Cs <sup>+</sup> | NO <sub>3</sub> <sup>-</sup> | Ligand | Equilibrated Box Dimensions          |
|------------------|-----------------|------------------------------|--------|--------------------------------------|
| 7205             | 130             | 130                          | 40     | 58.43 × 58.43 × 70.69 Å <sup>3</sup> |
| 7205             | 130             | 130                          | 60     | 59.03 × 59.03 × 71.41 Å <sup>3</sup> |
| 7205             | 130             | 130                          | 80     | 58.85 × 58.85 × 74.04 Å <sup>3</sup> |
| 7205             | 130             | 130                          | 100    | 60.03 × 60.03 × 72.62 Å <sup>3</sup> |
| 7205             | 130             | 130                          | 130    | 61.01 × 61.01 × 73.79 Å <sup>3</sup> |
| 7205             | 130             | 130                          | 160    | 61.66 × 61.66 × 74.59 Å <sup>3</sup> |
| 7205             | 130             | 130                          | 260    | 57.29 × 57.29 × 97.02 Å <sup>3</sup> |

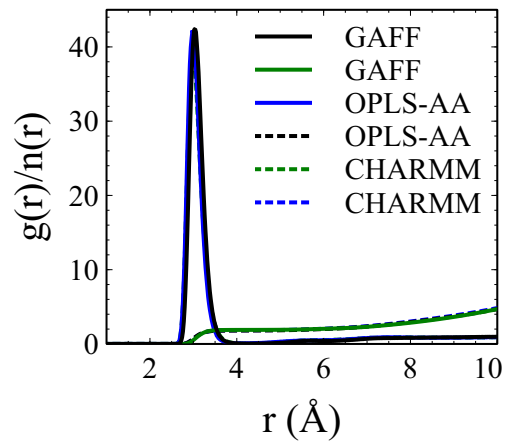

Figure S 1: Radial distribution ( $g(r)$ ) and coordination number ( $n(r)$ ) between Cs<sup>+</sup> and O<sub>C</sub> (oxygen atoms of 18-crown-6) as a function of radial distance for different host force fields.

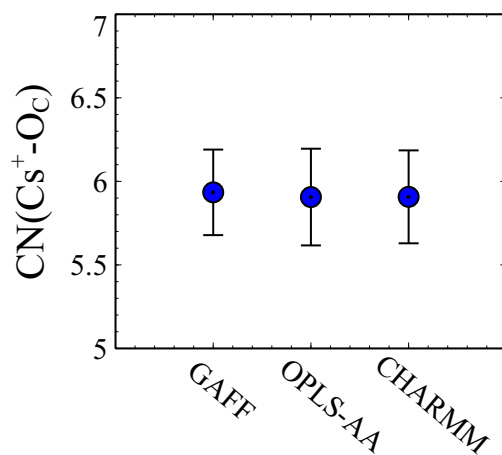

Figure S 2: Average Coordination number of interacting  $\text{O}_C$  (crown oxygen atoms) around central  $\text{Cs}^+$  ions in systems with crown ether modelled using different force fields. Note that only  $\text{Cs}^+$  atoms that were directly interacting with the host molecules were taken into consideration for these calculations. The standard deviations of the coordination distributions of each host-guest system is shown as error bars.

Coordination Dynamics To probe the impact of the increase in host pre-organization and concentration on the dynamics of solvent and counter-anions in the guest coordination shells, we computed the lifetime distributions  $P(t)$  of  $\text{H}_2\text{O}$  and  $\text{NO}_3^-$  in  $\text{Cs}^+$  coordination shells. Geometric cutoffs were used to compute the continuous time duration  $N(t, \Delta t)$  of atoms ( $\text{O}_\text{W}$  for water and  $\text{O}_\text{N}$  for nitrate) in the coordination shell.<sup>1</sup> The probability  $P(t)$  was defined as

$$P(t) = \frac{N(t, \Delta t)}{\sum_t N(t, \Delta t)} \quad (1)$$

and the corresponding residence time ( $\tau$ ) is,

$$\tau = \sum_{t=1}^{t_{\max}} t P(t) dt. \quad (2)$$

where  $t_{\max}$  is the maximum duration of continuous residence.

Order Parameter The extent of order within the local water network is computed using Steinhardt order parameter<sup>2</sup> as

$$q_l^i = \left[ \frac{4\pi}{2l+1} \sum_{m=-l}^l \left| \frac{1}{N} \sum_{j=1}^N Y_l^m(\vec{r}_j) \right|^2 \right]^{\frac{1}{2}} \quad (3)$$

where,  $Y_l^m$  is the spherical harmonics function. For angular momentum number  $l = 6$ , the magnetic quantum number ranges from -6 to 6. Here,  $\vec{r}_j$  is the vector from reference  $i$  to nearest neighbour  $j$ .  $N$  is the number of nearest neighbours of the central atom  $j$ . Note that the values of the sixth order Steinhardt parameter  $q_6 \sim 1$  represents an order solid-like and  $q_6 \sim 0$  represents a disordered liquid-like molecular arrangement.

## Results and Discussion

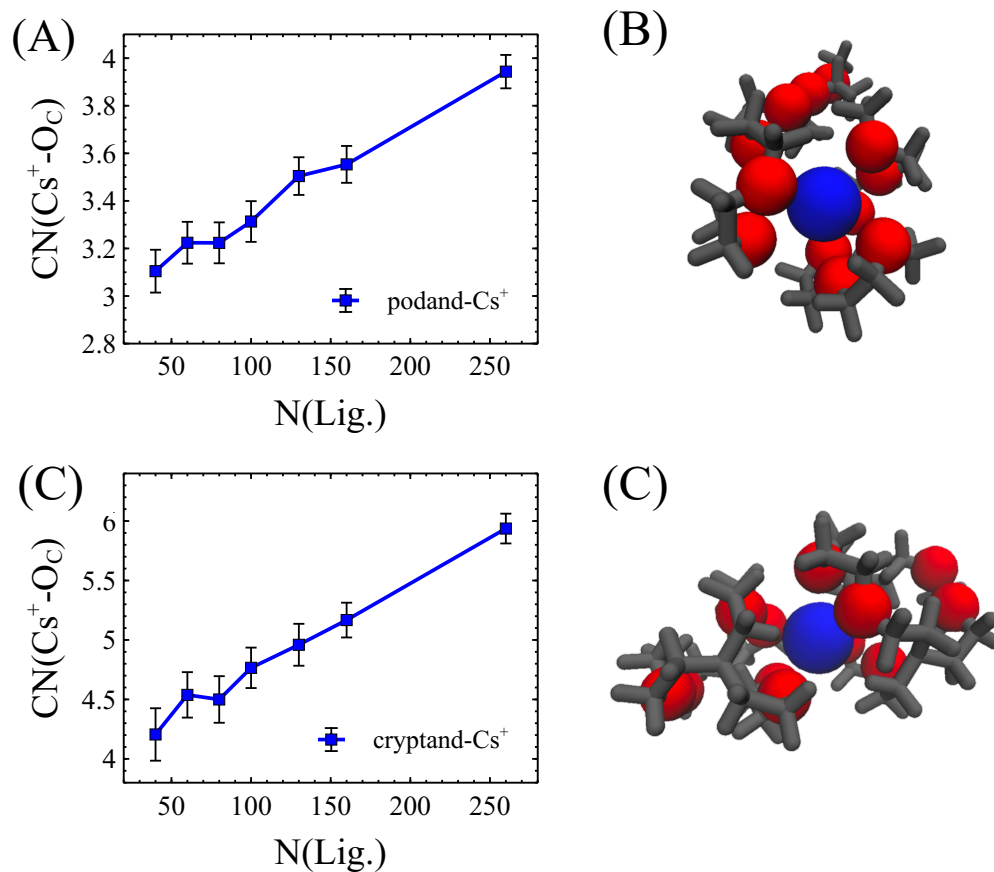

Figure S 3: (A) Coordination number of  $O_C$  (podand oxygen atoms) around central  $Cs^+$  ions with increase in the podand concentration. (B) An illustration of a sandwich complex formed between podands and  $Cs^+$  at  $n=260$ . Cesium ions are shown in blue, podand oxygen atoms are shown in red and all other atoms are colored grey. (C) The coordination number of  $O_C$  (cryptand oxygen atoms) around central  $Cs^+$  ions with an increase in the cryptand concentration. (D) An illustration of a sandwich complex formed by cryptand with  $Cs^+$  at  $n=260$ . Cesium ions are shown in blue, cryptand oxygen atoms are shown in red and all other atoms are colored grey. The standard deviations of coordination distributions of each host-guest system are shown as error bars.

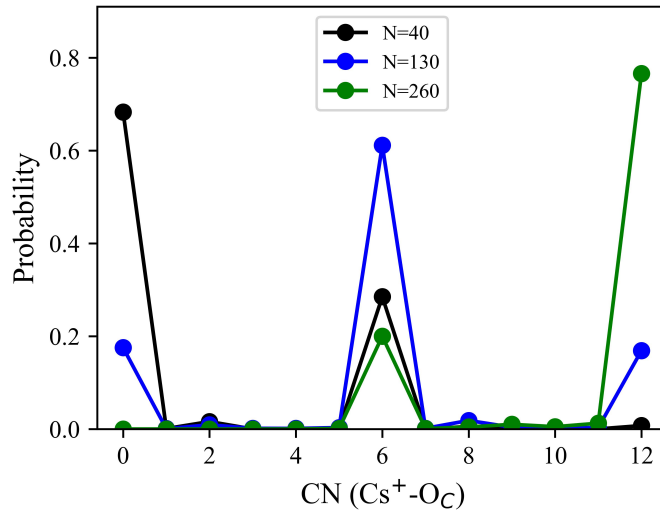

Figure S 4: Probability distribution of  $O_C$  (crown) around  $Cs^+$  in the primary coordination shell at different crown concentrations.

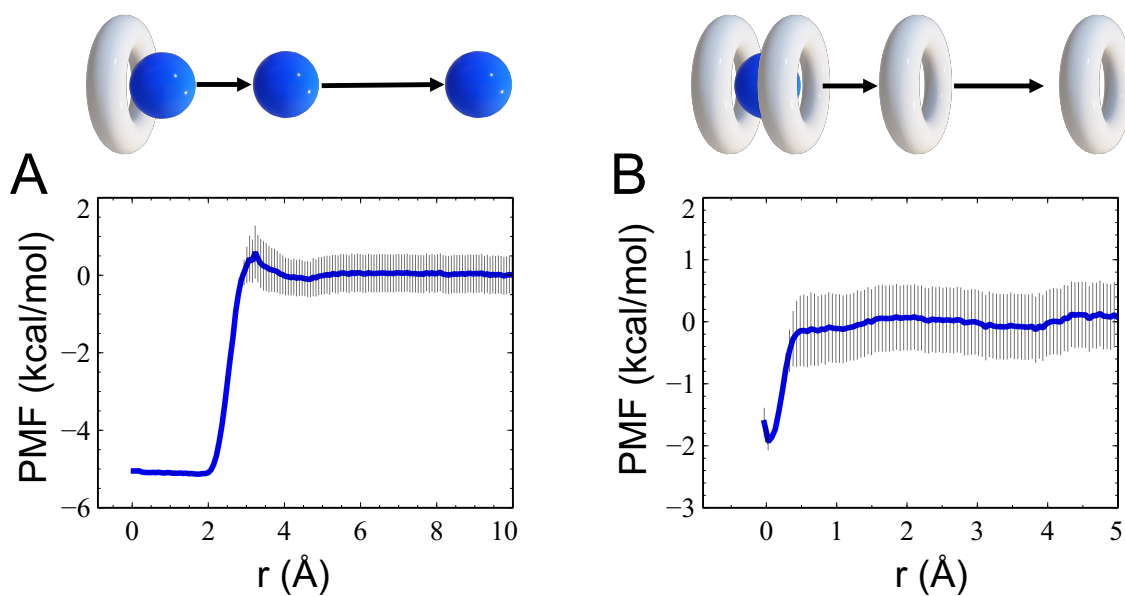

Figure S 5: Potential of mean force (PMF) between  $Cs^+$  and crown with the  $Cs^+$ -crown distance as reaction coordinate from bound to unbound state in aqueous media. (A) PMF for  $Cs^+$  binding to form 1:1 host-guest complex. (B) PMF for guest binding to form 2:1 sandwich complex. An illustration of host-guest complexes and the reaction coordinate is provided on the top of the respective PMFs.



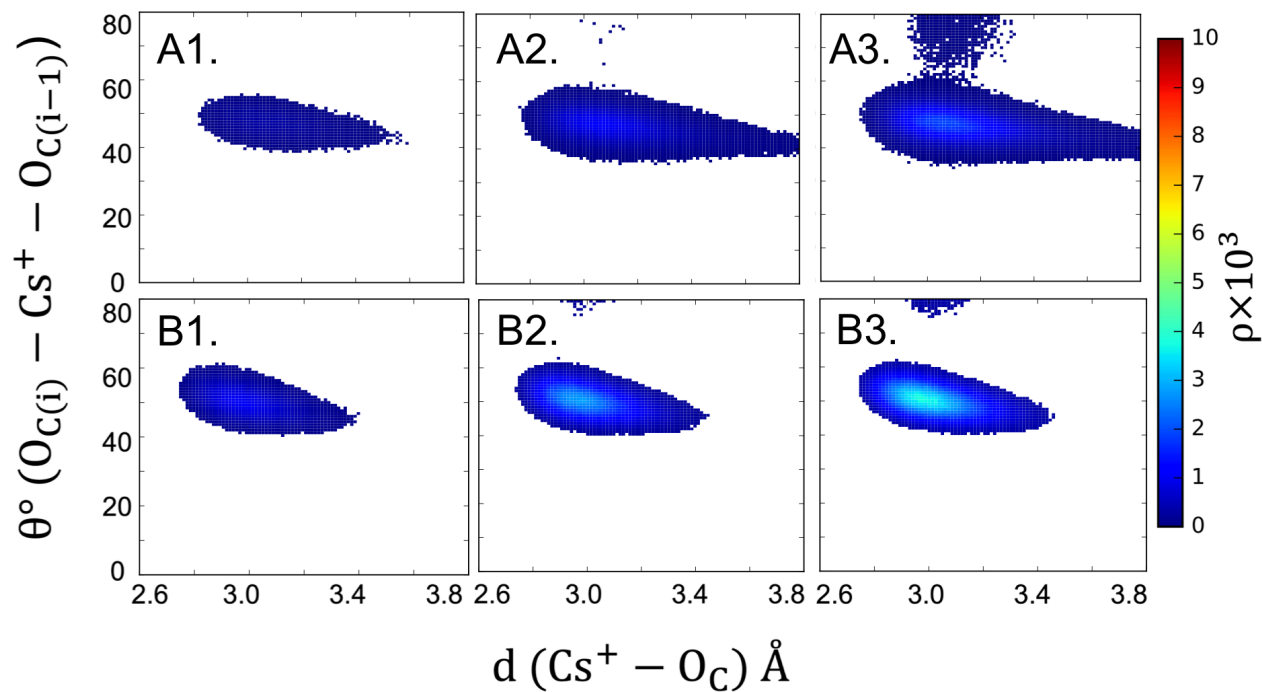

Figure S 6: Combined angular/spatial distributions of  $O_{C(i)}-Cs^+-O_{C(i-1)}$  angle and  $Cs^+-O_{C(i)}$  distances between  $Cs^+$  ions and crown oxygen atoms in systems with (A1.) 40 (A2.) 130 (A3.) 260 podand and (B1.) 40 (B2.) 130 (B3.) 260 cryptand molecules.

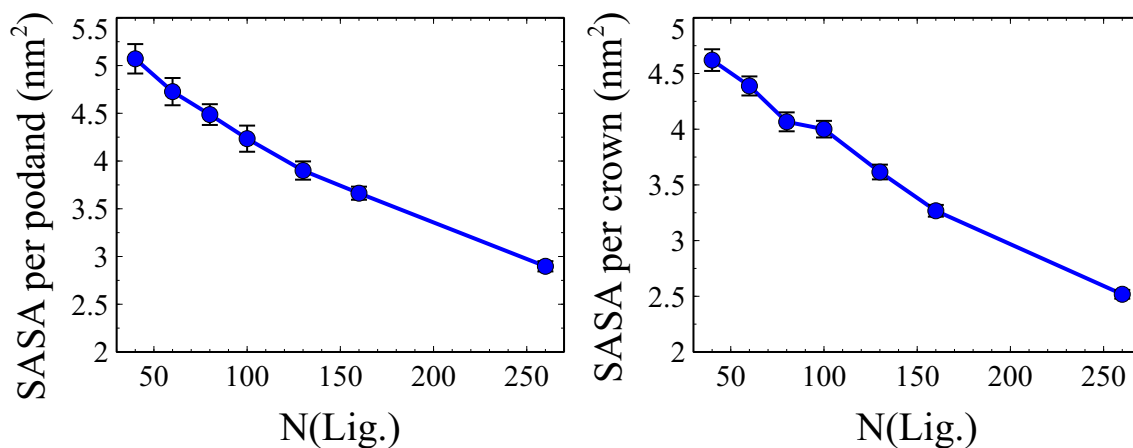

Figure S 7: Solvent accessible surface area (SASA) of podand and crown at different host concentrations.

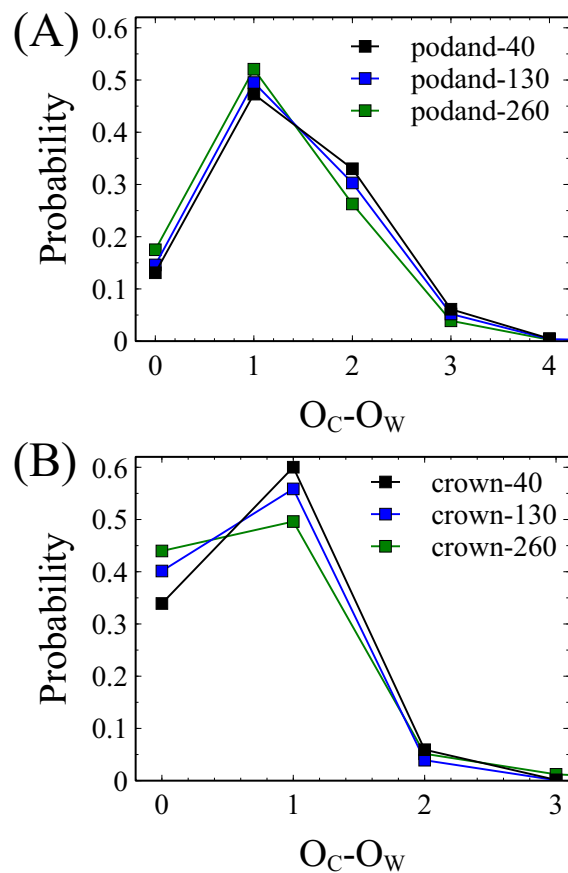

Figure S 8: Probability distribution of  $O_W$  (water oxygen atoms) around  $O_C$  (host oxygen atoms) of (A) podand and (B) 18-crown-6 molecules at different concentrations.

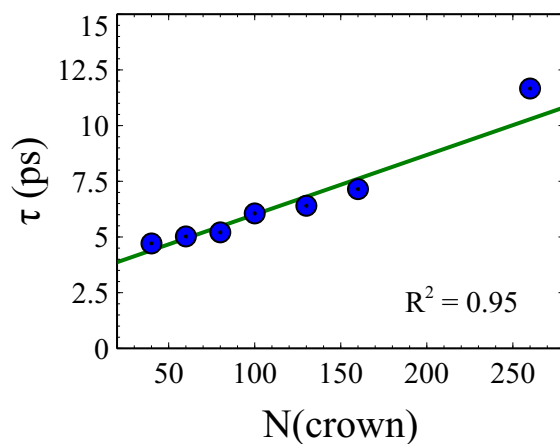

Figure S 9: Ensemble average residence times of the  $H_2O$  molecules in primary  $Cs^+$  coordination shells in systems with 18-crown-6. The lifetimes were fitted to the linear regression model to probe the linear dependence of solvation dynamics on system composition.

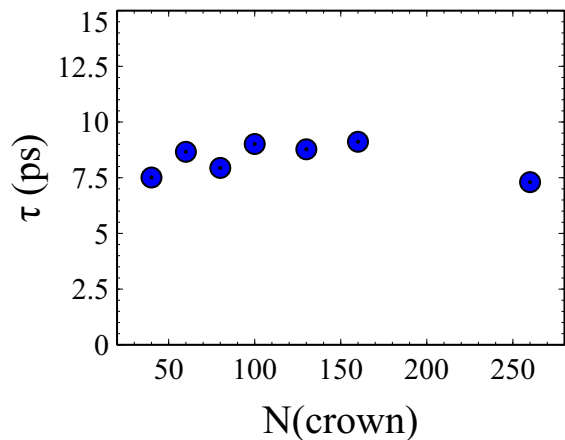

Figure S 10: Residence time of  $\text{O}_N$  (nitrate oxygen atoms) in the primary coordination of  $\text{Cs}^+$  atoms as a function of host concentration.

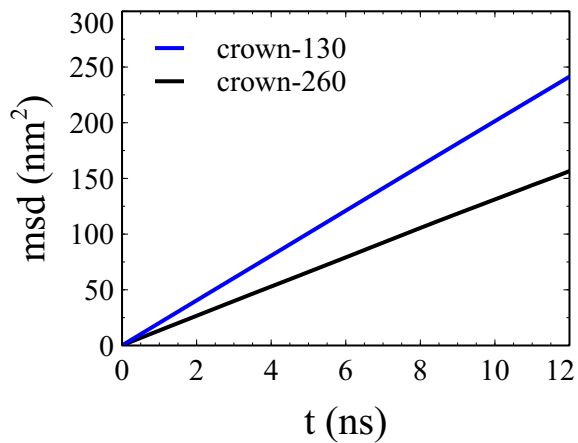

Figure S 11: Mean square displacements of host molecules at different host concentrations.

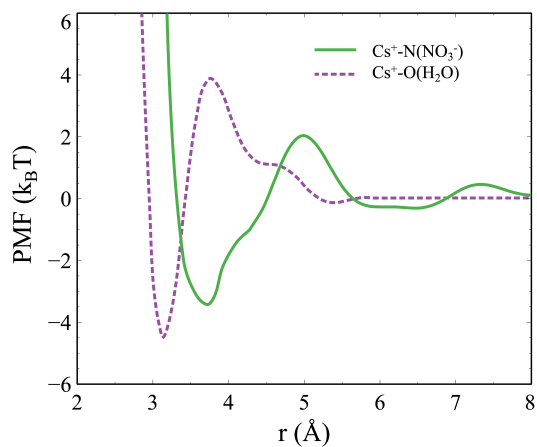

Figure S 12: Potential of mean forces between  $\text{Cs}^+-\text{N}(\text{NO}_3^-)$  and  $\text{Cs}^+-\text{O}(\text{H}_2\text{O})$  with the radial distance as reaction coordinate.

*Impact of Host-Guest Interactions on Water Structure* The influence of host pre-organization and concentration on solvent topology has been analyzed utilizing pair-correlation functions, the inter-molecular hydrogen-bonding network, and the  $q_6$  order parameter (Figure S13). It is observed that the pre-organization of the host exerts negligible perturbation on the structural configuration and local ordering of water. This conclusion is drawn from the observation that water ( $O_W$ ) pair-correlation functions and the primary solvation coordination number distributions remain consistent across podand, crown, and cryptand host systems. Notably, the distributions across these systems consistently revealed that water exhibits the highest propensity to establish four inter-molecular connections (Figure S13 B). On the other side, host concentration alters the topology of the water H-bonding network due to enhanced crown clustering on the addition of host molecules. In particular, the increased host concentration generated a disorder within the water network, resulting in a shift in  $q_6$  to a lower value (Figure S13 C).

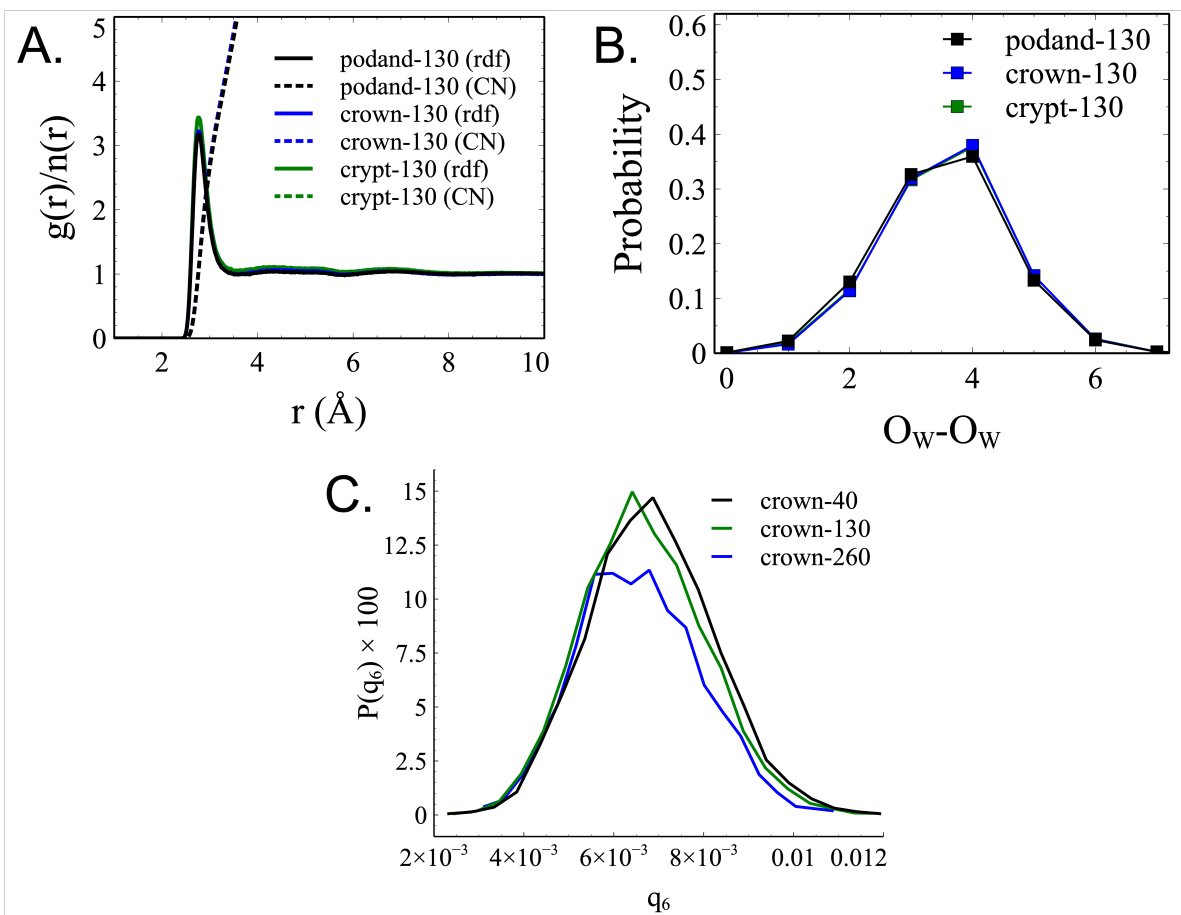

Figure S 13: (A) Radial distribution and coordination number as a function of the radial distance between oxygen atoms within different host-guest systems. (B) Probability of different water (O<sub>w</sub>) coordination in the systems with different host molecules. A 3.5 Å cutoff is used to obtain the water-water coordination numbers. (C) The sixth order Steinhardt parameter  $q_6$  probability distributions for water ordering in systems with 18-crown-6 as host. Note that O(H<sub>2</sub>O) atoms were considered as the reference for the computation.

## References

- (1) Michaud-Agrawal, N.; Denning, E. J.; Woolf, T. B.; Beckstein, O. MDAnalysis: A Toolkit for the Analysis of Molecular Dynamics Simulations. *Journal of Computational Chemistry* **2011**, *32*, 2319–2327.
- (2) Lechner, W.; Dellago, C. Accurate Determination of Crystal Structures based on Averaged Local Bond Order Parameters. *The Journal of Chemical Physics* **2008**, *129*, 114707.
